# Supplementary material for: Site-Specific Dual-Labeling of a VHH with a Chelator and a Photosensitizer for Nuclear Imaging and Targeted Photodynamic Therapy of EGFR-Positive Tumors
Source: PubMed Central journal article supplement (PMC7865570; doi:10.3390/cancers13030428), 2021-01-23
Supplement: cancers-13-00428-s001.pdf [file cancers-13-00428-s001.pdf]

# Supplementary material **Site-Specific Dual-Labeling of a VHH with a Chelator and a Photosensitizer for Nuclear Imaging and Targeted Photodynamic Therapy of EGFR-Positive Tumors**

|                                                                                            |    |
|--------------------------------------------------------------------------------------------|----|
| Abbreviations .....                                                                        | 1  |
| Materials and general procedures .....                                                     | 1  |
| Synthesis and analytical characterization of the bimodal probe DTPA-NH-Tz-S-IRDye700DX ... | 6  |
| Site-specific labeling of 7D12 with the bimodal probe .....                                | 12 |
| Spectral properties of compounds .....                                                     | 16 |
| Stability test by RP-HPLC in radiolabeling-like conditions.....                            | 17 |

## Abbreviations

BCN: Bicyclo[6.1.0]nonyne

CV: Column volume

DIPEA: *N,N*-Diisopropylethylamine

DMF: *N,N*-Dimethylformamide

DOL: Degree of labeling

DTPA: Diethylenetriaminepentaacetic acid

ESI: Electrospray ionization

FA: Formic acid

HATU: 1-[Bis(dimethylamino)methylene]-1H-1,2,3-triazolo[4,5-b]pyridinium 3-oxid hexafluorophosphate

HPLC: High performance liquid chromatography

HRMS: High resolution mass spectrometry

LRMS: Low resolution mass spectrometry

MALDI-TOF: Matrix-assisted laser desorption ionization - Time of flight

MES: 2-(*N*-morpholino)ethanesulfonic acid

NHS: *N*-hydroxysuccinimide

PB: Phosphate buffer

PBS: Phosphate buffered saline

PEG: Polyethylene glycol

RT: Room temperature

TCEP: Tris(2-carboxyethyl)phosphine

TEAB: Triethylammonium bicarbonate

TFA: Trifluoroacetic acid

THF: Tetrahydrofuran

TSTU: *N,N,N',N'*-tetramethyl-*O*-(*N*-succinimidyl)uronium tetrafluoroborate

UV: Ultraviolet

## Materials and general procedures

**Chemicals.** All chemicals were purchased from Sigma-Aldrich, Acros Organics, Alfa Aesar and TCI Europe and used without further purification. IRDye700DX-NHS was purchased from LICOR (USA). DTPA was kindly provided by CheMatech (France). Moisture sensitive reactions were performed under nitrogen or argon atmosphere. HPLC-gradient grade MeCN was obtained from Biosolve or Carlo Erba. LC-HRMS grade MeCN was obtained from Fisher Scientific. All aqueous buffers used in this work and aqueous mobile-phases for HPLC were prepared using water purified to 18.2 MΩ cm with a PURELAB Ultra system from ELGA.

**Ion chromatography.** The number of TFA counterions was quantified by ionic chromatography. Analyses were performed using an ICS 5000 system from Thermo Scientific equipped with a conductivity detector CD (Thermo Scientific)

and a conductivity suppressor ASRS-ultra II 4 mm (Thermo Scientific). TFA was separated using an Ion Pac AS11-HC analytical column (4  $\mu\text{m}$ , 4  $\times$  250 mm, Thermo Scientific) equipped with an Ion Pac AS11-HC guard column (4  $\mu\text{m}$ , 4  $\times$  250 mm, Thermo Scientific). Chromatographic analyses were recorded with Chromeleon software, 7.2. The elution of TFA was conducted with a 15 min isocratic elution with 90% eluent A (NaOH 30 mM) and 10% eluent B (H<sub>2</sub>O) at a flow rate of 1.5 mL/min and a column temperature of 30 °C.

**Semi-preparative HPLC.** Purifications were performed on an UltiMate 3000 system Dionex (Thermo Scientific) equipped with an UV-visible detector, on one of the following columns: BetaBasic-18 column (Thermo Scientific; 5  $\mu\text{m}$ , 150 Å, 150  $\times$  30 mm) at 20 mL/min or Hypersil gold C18 column (Thermo Scientific, 100 Å, 250  $\times$  10 mm) at 3.5 mL/min, with HPLC grade eluents. The fractions of interest were analyzed by HPLC-MS, pooled, concentrated under reduced pressure to remove organic solvents and freeze-dried.

**HPLC-MS.** The compounds were analyzed by HPLC-MS, performed on an UltiMate 3000 system Dionex (Thermo Scientific) equipped with a DAD detector and coupled to a low-resolution mass spectrometry detector MSQ Plus (Thermo Scientific) equipped with an ESI source. Separation was achieved using an RP Kinetex™ column (Phenomenex) (2.6  $\mu\text{m}$ , 100 Å, 50  $\times$  2.1 mm) with ultrapure water and HPLC-grade MeCN (A: H<sub>2</sub>O 0.1% FA and B: MeCN 0.1% FA). Analyses were performed with the following gradient program: 5% to 100% of B in 5 min, 100% B for 1.5 min, 100% to 5% B in 0.1 min and 5% B for 1.9 min, at a flow rate of 0.5 mL/min. The purity of compounds was determined from the integration of RP-HPLC-MS chromatograms at 214 nm.

HPLC-MS chromatogram of H<sub>2</sub>O injection (blank) at 214 nm:

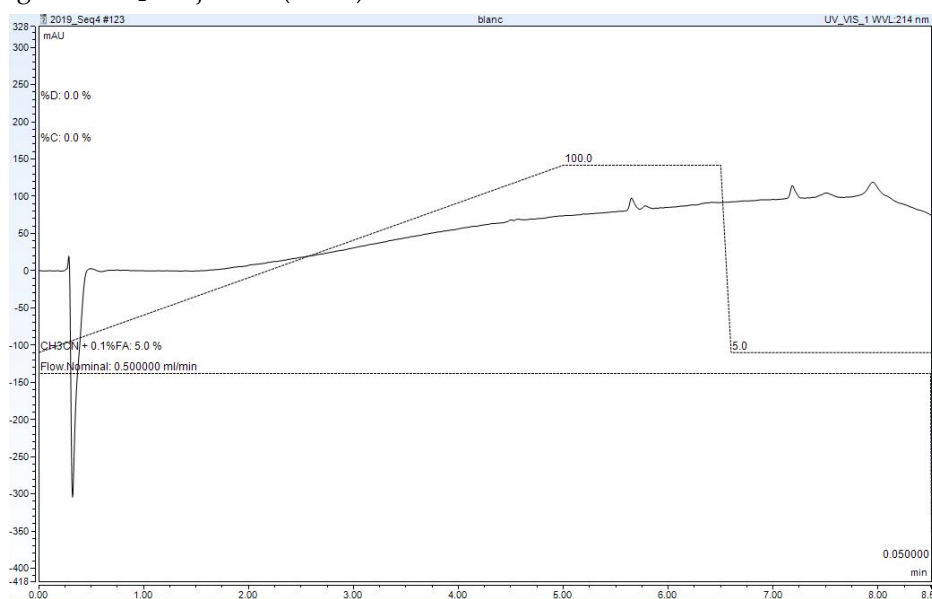

**HRMS.** Spectra were recorded on a mass spectrometer LTQ Orbitrap XL (Thermo Scientific) using an ESI source. Spectra were recorded in positive mode.

**RP-HPLC-HRMS.** The protein 7D12 and related conjugates were characterized by RP-HPLC-HRMS performed on a HPLC UltiMate 3000 system (Thermo Scientific) equipped with a UV-visible detector and coupled to a high-resolution mass spectrometer LTQ Orbitrap XL (Thermo Scientific) equipped with an ESI source. The separation was achieved on a Thermo Scientific™ MAbPac™ column (4  $\mu\text{m}$ , 50  $\times$  21 mm) with the following eluents: A: H<sub>2</sub>O, 0.1% FA + 0.02% TFA and B: MeCN/H<sub>2</sub>O (90 : 10, v/v), 0.1% FA + 0.02% TFA, and a linear gradient program: 5% to 100% of B in 15 min, 100% B for 3 min, 100% to 5% B in 0.1 min and 5% B for 6 min, at a flow rate of 0.3 mL/min, at 80 °C. Multicharged mass spectra were deconvoluted with Protein Deconvolution 2.0 software (Thermo Scientific).

**MALDI-TOF.** Analyses were recorded on a Bruker Daltonics Ultraflex II spectrometer equipped with a Smartbeam (Nd-YAG 355 nm) and used in the MALDI-TOF linear positive mode (10–25 kDa mass range). Samples were desalted

using C4 ZipTips, mixed with a freshly prepared 3,5-dimethoxy-4-hydroxycinnamic acid matrix solution and spotted on an MSP 365 MALDI plate.

**<sup>1</sup>H- and <sup>13</sup>C-NMR.** Spectra were recorded on Bruker Avance Neo 500 MHz spectrometers under routine conditions at 298 K and were referenced to TMS or residual solvent signals. The following abbreviations and their combinations are used: s, singlet; d, doublet; t, triplet; q, quadruplet; m, multiplet. **Protein concentrations.** Concentrations of protein and protein conjugates were determined by measuring the absorbance on a Varian Cary 50 (double beam) spectrophotometer by using a TrayCell (Hellma, pathlength: 0.2 (factor 50) mm or 1.0 (factor 10) mm, chamber volume 0.7–4 µL), at 25 °C. **UV-visible spectra.** Spectra were obtained on an Agilent Cary 50 UV-Vis-Spectrophotometer by using a rectangular quartz cell (Hellma, 100-QS, 45 × 12.5 × 12.5 mm, pathlength: 10 mm, chamber volume: 3.5 mL), at 23 °C. Fluorescence spectroscopic studies were recorded on a JASCO FP8500 spectrofluorometer in a 10 mm path-length semi-micro quartz cuvette (Starna), at 25 °C.

## Synthesis and analytical characterization of the bimodal probe DTPA-NH-Tz-S-IRDye700DX

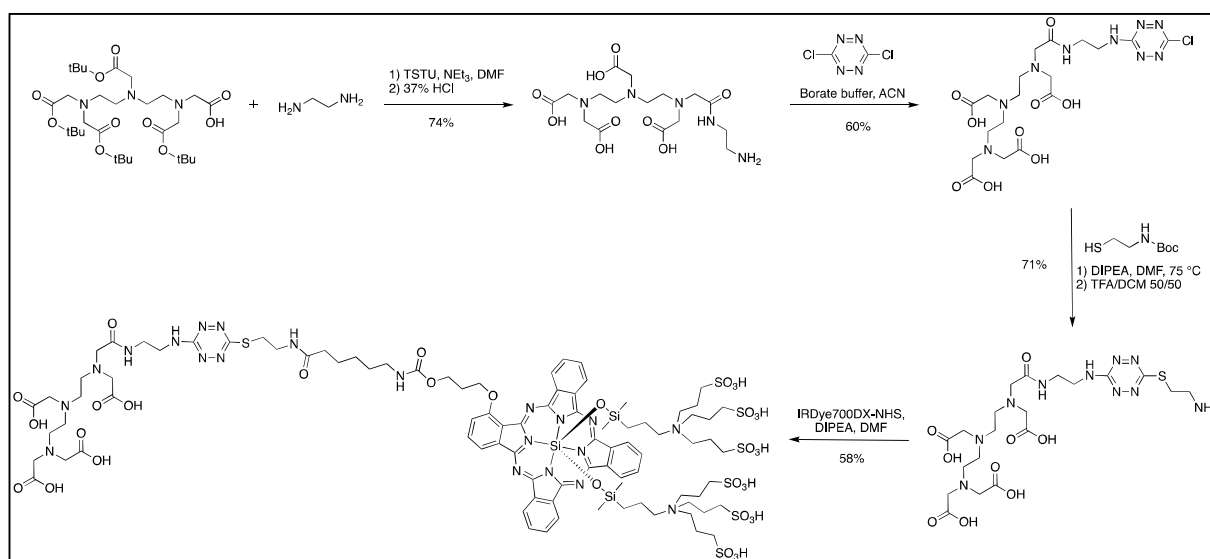

**Figure S1.** Synthesis of the bimodal probe DTPA-NH-Tz-S-IRDye700DX.

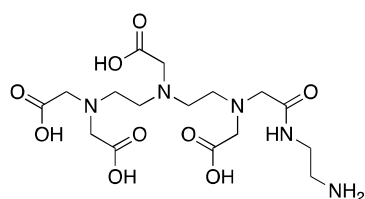

**DTPA-NH<sub>2</sub>.** TSTU (121 mg, 0.402 mmol, 1.2 equiv.) was added to a solution of DTPA(tBu)<sub>4</sub> ester (207 mg, 0.335 mmol, 1 equiv.) in DMF (2 mL) with NEt<sub>3</sub> (140 μL, 1.005 mmol, 3 equiv.). The solution was stirred at room temperature for 1 h. Ethylenediamine (224 μL, 3.35 mmol, 10 equiv.) was then added to the activated ester and the reaction mixture was stirred for 2 h at room temperature to give a white suspension.

This mixture was concentrated under vacuum and purified on semi-preparative HPLC on a BetaBasic-18 column (A: H<sub>2</sub>O 0.1% TFA, B: MeCN 0.1% TFA; with the following gradient program: 5% of B for 10 min, 5% to 70% of B in 50 min, at a flow rate of 20 mL/min) to obtain a white solid. HCl 37% (6 mL) was added to the solid and the mixture was concentrated under vacuum. After lyophilization, the expected compound (brown solid) was obtained as a hydrochloride (3 HCl) salt (134.4 mg, 74%). The compound was analyzed with RP-HPLC-MS (Figure S2), <sup>1</sup>H- and <sup>13</sup>C-NMR and HRMS (Figure S3).

RP-HPLC-MS: *t<sub>r</sub>* = injection peak, *m/z* calculated for C<sub>16</sub>H<sub>29</sub>N<sub>5</sub>O<sub>9</sub> [M+H]<sup>+</sup> 436.2, found 436.3.

<sup>1</sup>H-NMR (500 MHz, D<sub>2</sub>O): δ = 3.1-3.25 (m, 6H), 3.45-3.6 (m, 6H), 3.68 (s, 2H), 4.14 (s, 4H), 4.19 (s, 4H) ppm; <sup>13</sup>C-NMR (126 MHz, D<sub>2</sub>O): δ = 37.0 (CH<sub>2</sub>), 38.8 (CH<sub>2</sub>), 49.6 (CH<sub>2</sub>), 49.9 (CH<sub>2</sub>), 52.9 (CH<sub>2</sub>), 53.9 (CH<sub>2</sub>), 55.4 (CH<sub>2</sub>), 56.2 (CH<sub>2</sub>), 167.5 (C), 169.2 (C), 169.4 (C), 173.3 (C) ppm.

HRMS: *m/z* calculated for C<sub>16</sub>H<sub>29</sub>N<sub>5</sub>O<sub>9</sub> [M+H]<sup>+</sup> 436.20447, found 436.20408.

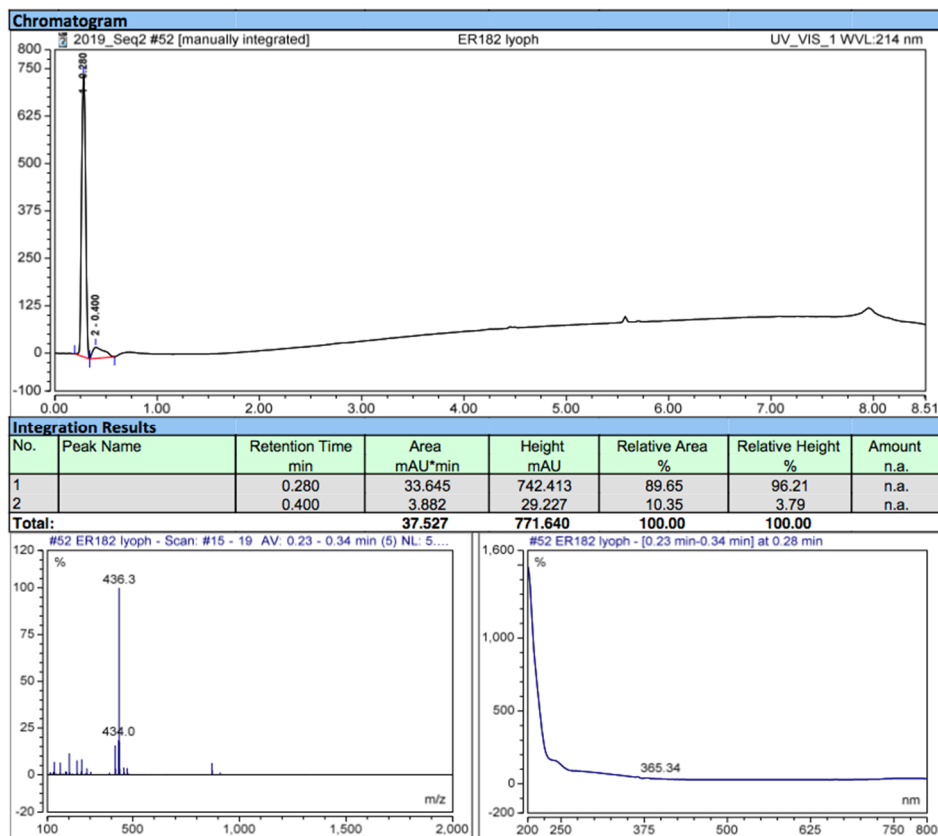

Figure S2. RP-HPLC-MS analysis of DTPA-NH<sub>2</sub>. (Top) RP-HPLC chromatogram. (Bottom) ESI (+)-LRMS and UV-Vis absorbance spectrum.

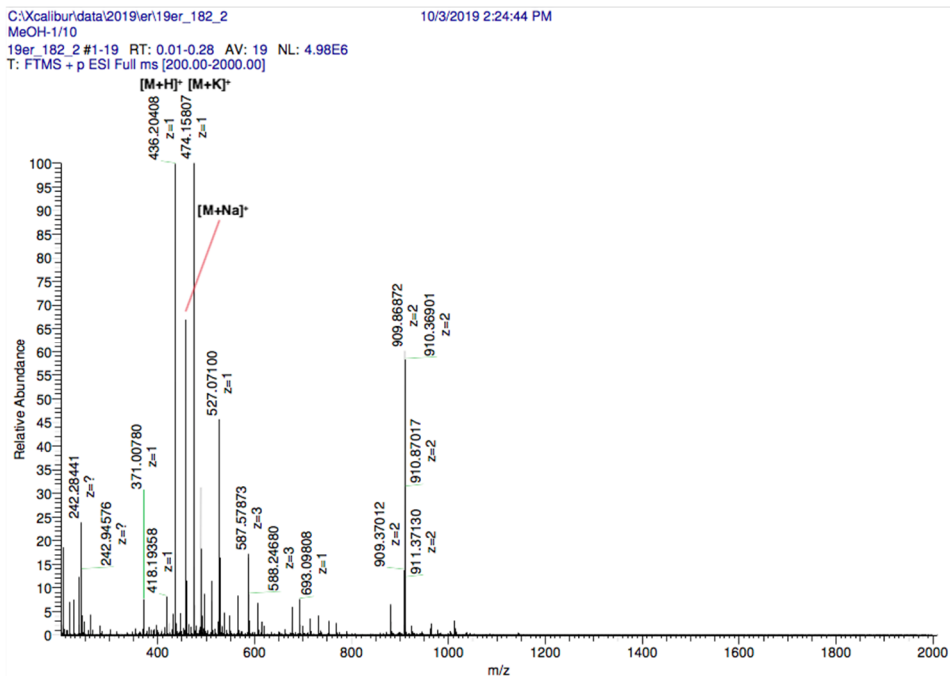

Figure S3. HRMS analysis of DTPA-NH<sub>2</sub>.

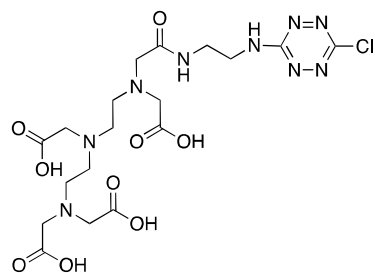

**DTPA-NH-Tz-Cl.** A solution of 3,6-dichloro-1,2,4,5-tetrazine (44.9 mg, 0.298 mmol, 1.2 equiv.) in acetonitrile (1 mL) was added to a solution of DTPA-NH<sub>2</sub> (134.4 mg, 0.248 mmol, 1 equiv.) in 0.1 M borate buffer pH 8.0 (4 mL). The resulting orange solution was stirred at room temperature for 1 h. The mixture was concentrated under vacuum and purified by semi-preparative HPLC on a BetaBasic-18 column (A: H<sub>2</sub>O 0.1% TFA, B: MeCN 0.1% TFA; with the following gradient program: 2% of B for 10 min, 2% to 40% of B in 50 min, at a flow rate of 20 mL/min) to give an orange powder (98 mg, 60%). The compound was analyzed with RP-HPLC-MS (Figure S4), <sup>1</sup>H- and <sup>13</sup>C-NMR and HRMS (Figure S5).

Ionic chromatography: 1 TFA salt.

RP-HPLC-MS: tr = 0.45 min, m/z calculated for C<sub>18</sub>H<sub>28</sub>ClN<sub>9</sub>O<sub>9</sub> [M+H]<sup>+</sup> 550.2, found 550.2.

<sup>1</sup>H-NMR (500 MHz, D<sub>2</sub>O): δ = 3.26 (t, J=5.8 Hz, 2H), 3.30 (t, J=6.0 Hz, 2H), 3.43 (t, J=5.8 Hz, 2H), 3.53 (t, J=6.1 Hz, 2H), 3.59 (t, J=5.4 Hz, 2H), 3.73 (t, J=5.5 Hz, 2H), 3.77 (s, 2H), 3.92 (s, 2H), 3.97 (s, 2H), 4.05 (s, 4H) ppm; <sup>13</sup>C-NMR (126 MHz, D<sub>2</sub>O): δ = 38.4 (CH<sub>2</sub>), 40.1 (CH<sub>2</sub>), 50.3 (CH<sub>2</sub>), 50.6 (CH<sub>2</sub>), 52.2 (CH<sub>2</sub>), 54.0 (CH<sub>2</sub>), 55.8 (CH<sub>2</sub>), 56.0 (CH<sub>2</sub>), 56.4 (CH<sub>2</sub>), 158.7 (C), 161.6 (C), 168.1 (C), 170.5 (C), 170.8 (C), 172.6 (C) ppm.

HRMS: m/z calculated for C<sub>18</sub>H<sub>28</sub>ClN<sub>9</sub>O<sub>9</sub> [M+H]<sup>+</sup> 550.17779, found 550.17602.

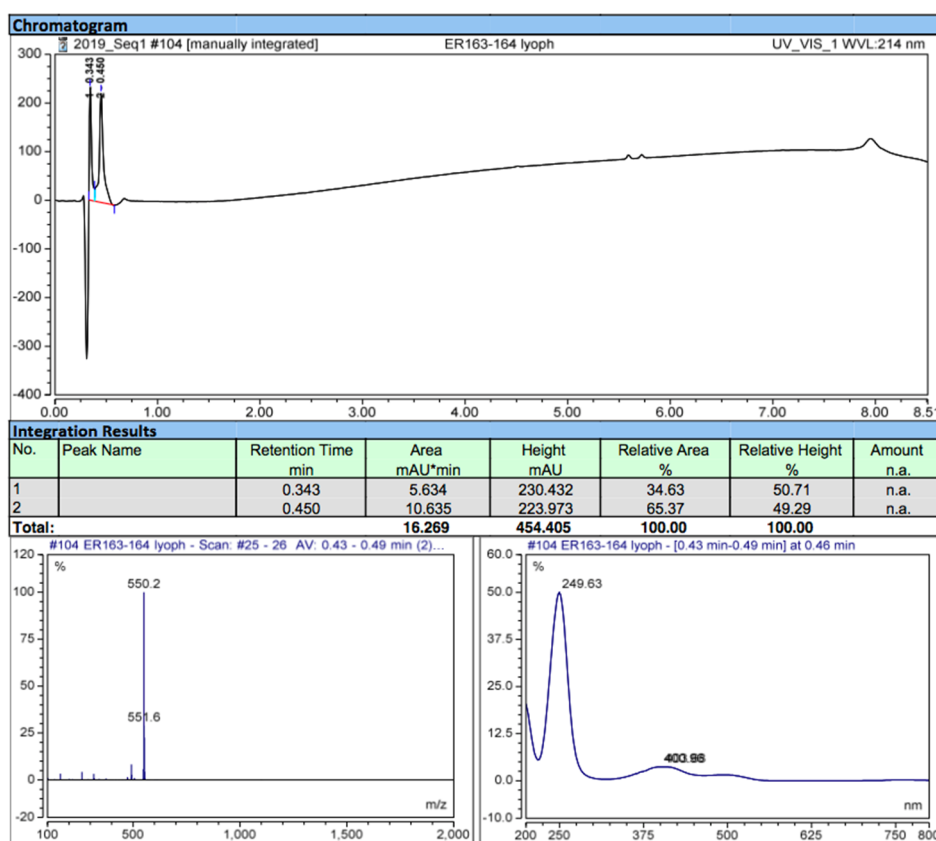

**Figure S4.** RP-HPLC-MS analysis of DTPA-NH-Tz-Cl (Top) RP-HPLC chromatogram. (Bottom) ESI (+)-LRMS and UV-Vis absorbance spectrum.

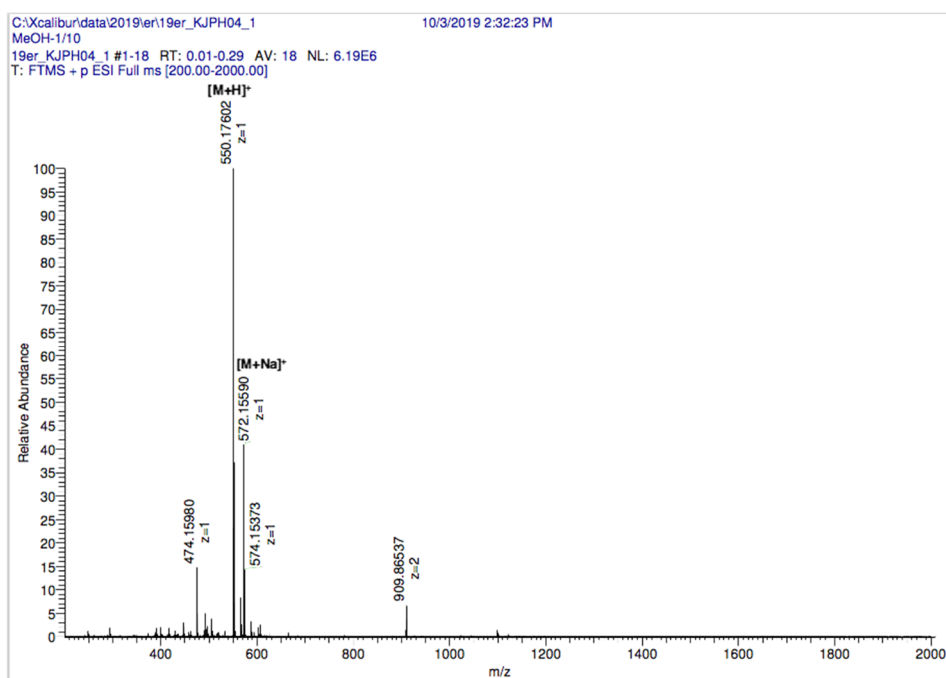

Figure S5. HRMS analysis of DTPA-NH-Tz-Cl.

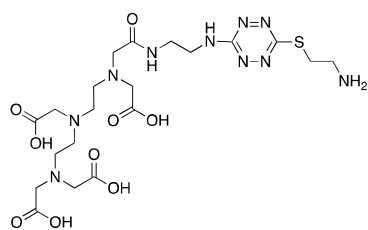

**DTPA-NH-Tz-NH<sub>2</sub>.** Tert-butyl (2-mercaptoethyl)carbamate (14.9 mg, 84.1  $\mu\text{mol}$ , 1.2 equiv.) in DMF (2 mL) was added to a solution of DTPA-NH-Tz-Cl (50 mg, 75.3  $\mu\text{mol}$ , 1 equiv.) in DMF (2 mL) and DIPEA (104.5  $\mu\text{L}$ , 602  $\mu\text{mol}$ , 8 equiv.). The resulting orange solution was stirred at 75  $^{\circ}\text{C}$ . After 2 h, the solvent was removed under vacuum.  $\text{CH}_2\text{Cl}_2$  (2 mL) and TFA (2 mL) were added and the resulting solution was stirred at room temperature for 2 h. After concentration under vacuum the mixture was purified

by semi-preparative HPLC on a BetaBasic-18 column (A:  $\text{H}_2\text{O}$  0.1% TFA, B: MeCN 0.1% TFA; with the following gradient program: 2% of B for 10 min, 2% to 40% of B in 50 min, at a flow rate of 20 mL/min) to afford an orange powder (43.8 mg, 71%). The compound was analyzed with RP-HPLC-MS (Figure S6),  $^1\text{H}$ - and  $^{13}\text{C}$ -NMR and HRMS (Figure S7).

Ionic chromatography: 2 TFA salt.

RP-HPLC-MS:  $t_{\text{r}} = 0.35$  min,  $m/z$  calculated for  $\text{C}_{20}\text{H}_{34}\text{N}_{10}\text{O}_9\text{S}$   $[\text{M}+\text{H}]^+$  591.2, found 591.4.

$^1\text{H}$ -NMR (500 MHz,  $\text{D}_2\text{O}$ ):  $\delta = 3.27$  (m, 4H), 3.43 (m, 4H), 3.55 (m, 6H), 3.70 (m, 2H), 3.76 (s, 2H), 3.91 (s, 2H), 3.98 (s, 2H), 4.05 (s, 4H) ppm;  $^{13}\text{C}$ -NMR (126 MHz,  $\text{D}_2\text{O}$ ):  $\delta = 27.8$  ( $\text{CH}_2$ ), 38.3 ( $\text{CH}_2$ ), 38.8 ( $\text{CH}_2$ ), 39.9 ( $\text{CH}_2$ ), 50.3 ( $\text{CH}_2$ ), 50.6 ( $\text{CH}_2$ ), 52.2 ( $\text{CH}_2$ ), 54.0 ( $\text{CH}_2$ ), 55.8 ( $\text{CH}_2$ ), 56.0 ( $\text{CH}_2$ ), 56.4 ( $\text{CH}_2$ ), 161.0 (C), 163.9 (C), 168.1 (C), 170.4 (C), 170.7 (C), 172.6 (C), ppm.

HRMS:  $m/z$  calculated for  $\text{C}_{20}\text{H}_{34}\text{N}_{10}\text{O}_9\text{S}$   $[\text{M}+\text{H}]^+$  591.23103, found 591.22921.

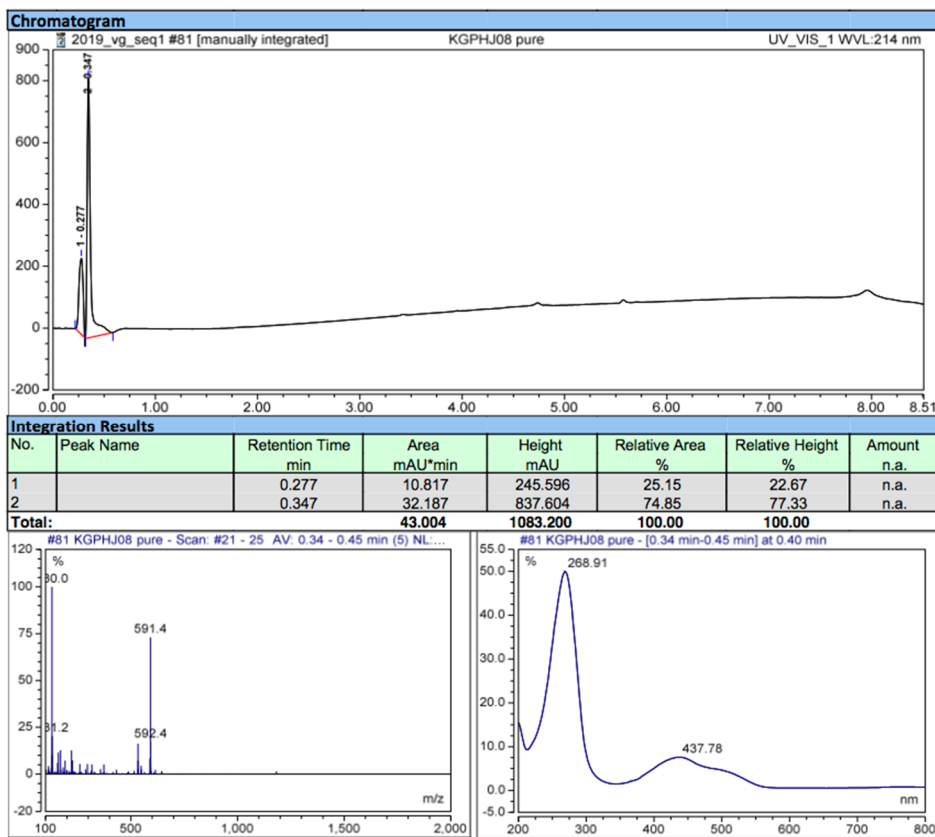

Figure S6. RP-HPLC-MS analysis of DTPA-NH-Tz-NH<sub>2</sub>. (Top) RP-HPLC chromatogram. (Bottom) ESI (+)-LRMS and UV-Vis absorbance spectrum.

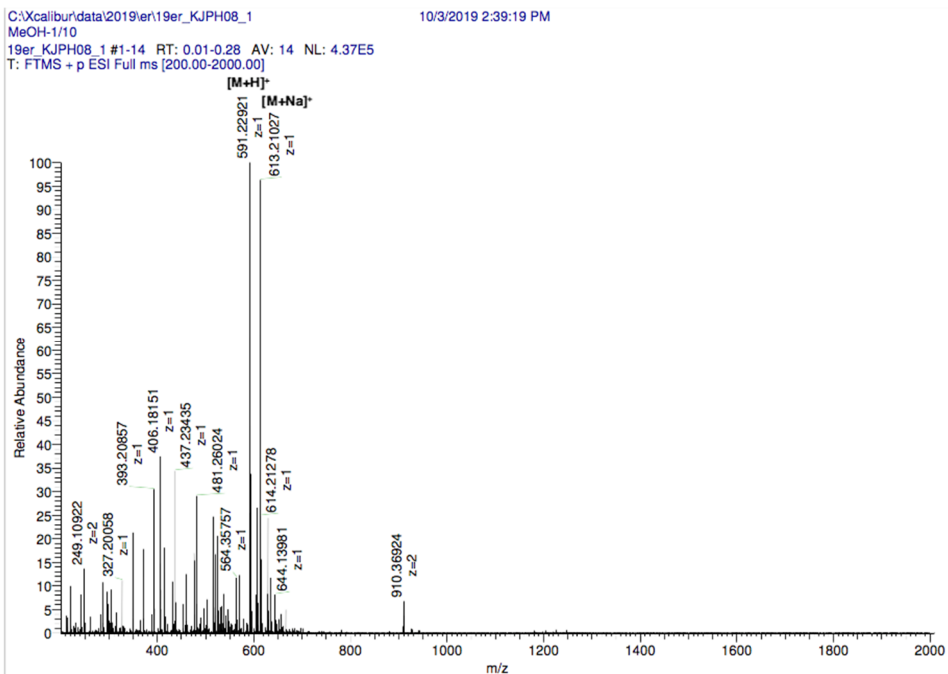

Figure S7. HRMS analysis of DTPA-NH-Tz-NH<sub>2</sub>.



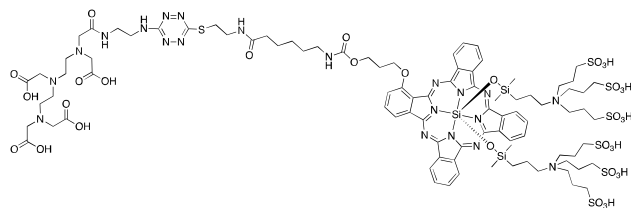

**DTPA-NH-Tz-S-IRDye700DX.** IRDye700DX (6.3 mg, 3.22  $\mu\text{mol}$ , 1 equiv.) in DMF (1 mL) with DIPEA (8  $\mu\text{L}$ , 45.9  $\mu\text{mol}$ , 14 equiv.) was added to a suspension of DTPA-NH-Tz-NH<sub>2</sub> (3.43 mg, 4.19  $\mu\text{mol}$ , 1.3 equiv.) in DMF (1 mL) with DIPEA (8  $\mu\text{L}$ , 45.9  $\mu\text{mol}$ , 14 equiv.). The green solution was stirred at RT overnight.

After concentration under vacuum, the mixture was purified by semi-preparative HPLC on an Hypersil column (A: TEAB 50 mM, B: MeCN with the following gradient program: 20% of B for 5 min, 20% to 60% of B in 60 min, at a flow rate of 3.5 mL/min) to give a blue/green powder (4.4 mg, 58%). The compound was analyzed with RP-HPLC-MS (Figure S8).

RP-HPLC-MS:  $t_r$  = 3.6 min.,  $m/z$  calculated for C<sub>90</sub>H<sub>129</sub>N<sub>21</sub>O<sub>33</sub>S<sub>7</sub>Si<sub>3</sub> [M+2H]<sup>2+</sup> 1170.8, found 1171.4,  $m/z$  calculated for [M+3H]<sup>3+</sup> 780.9, found 779.2.

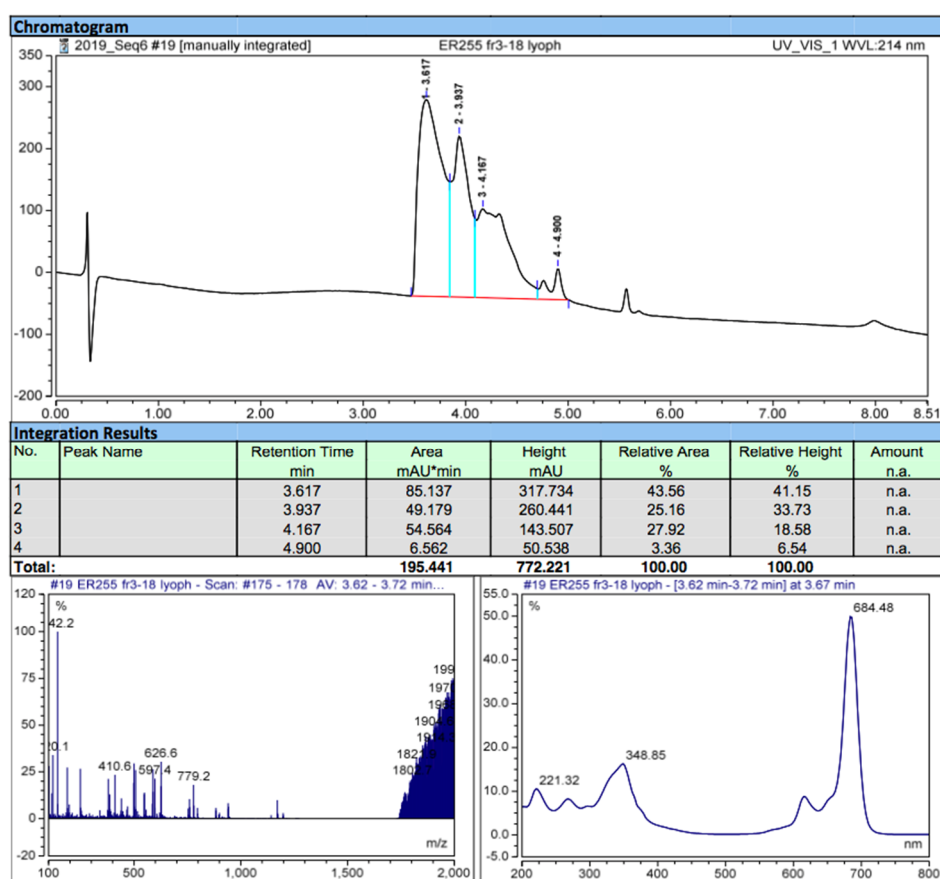

**Figure S8.** RP-HPLC-MS analysis of compound DTPA-NH-Tz-S-IRDye700DX (Top) RP-HPLC chromatogram. (Bottom) ESI (+)-LRMS and UV-Vis absorbance spectrum.

### Site-specific labeling of 7D12 with the bimodal probe

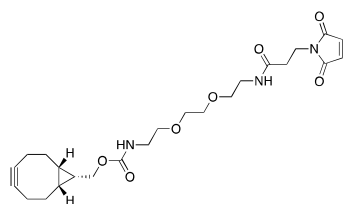

**BCN-PEG<sub>2</sub>-maleimide.** A solution of maleimide-NHS (13.5 mg, 50.1  $\mu\text{mol}$ , 1.1 equiv.) in DMF (0.5 mL) was added to a solution of BCN-PEG<sub>2</sub>-NH<sub>2</sub> (15 mg, 46  $\mu\text{mol}$ , 1 equiv.) in DMF (0.5 mL) and DIPEA (16.1  $\mu\text{L}$ , 92  $\mu\text{mol}$ , 2 equiv.). The resulting yellowish solution was stirred at RT. After 1 h, the reaction mixture was concentrated under vacuum and purified by semi-preparative HPLC on a BetaBasic-18 column (A: H<sub>2</sub>O 0.1% FA, B: MeCN

0.1% FA; with the following gradient program: 15% of B for 5 min, 15% to 65% of B in 50 min, at a flow rate of 20 mL/min) to give a colorless oil (9.1 mg, 41%, purity: 87%). The compound was analyzed with RP-HPLC-MS (Figure S9), <sup>1</sup>H- and <sup>13</sup>C-NMR and HRMS (Figure S10).

Note: this compound proved to be unstable, giving rise to unidentified products over time, even when stored at  $-80\text{ }^{\circ}\text{C}$ . It was aliquoted as a 20 mM solution in DMSO and kept at  $-20\text{ }^{\circ}\text{C}$ .

RP-HPLC-MS:  $t_r = 4\text{ min}$ ,  $m/z$  calculated for  $\text{C}_{24}\text{H}_{33}\text{N}_3\text{O}_7$   $[\text{M}+\text{H}]^+$  476.2, found 476.3.

$^1\text{H-NMR}$  (500 MHz,  $\text{CDCl}_3$ ):  $\delta = 0.8\text{--}1.0$  (m, 3H), 1.25 (m, 4H), 2.1–2.3 (m, 4H), 2.53 (t,  $J=7.2\text{ Hz}$ , 2H), 3.3–3.7 (m, 10H), 3.84 (t,  $J=7.2\text{ Hz}$ , 2H), 4.1 (m, 2H), 5.22 (br, 1H), 6.12 (br, 1H), 6.70 (d, 2H) ppm.

HRMS:  $m/z$  calculated for  $\text{C}_{24}\text{H}_{33}\text{N}_3\text{O}_7$   $[\text{M}+\text{H}]^+$  476.23185, found 498.22166.

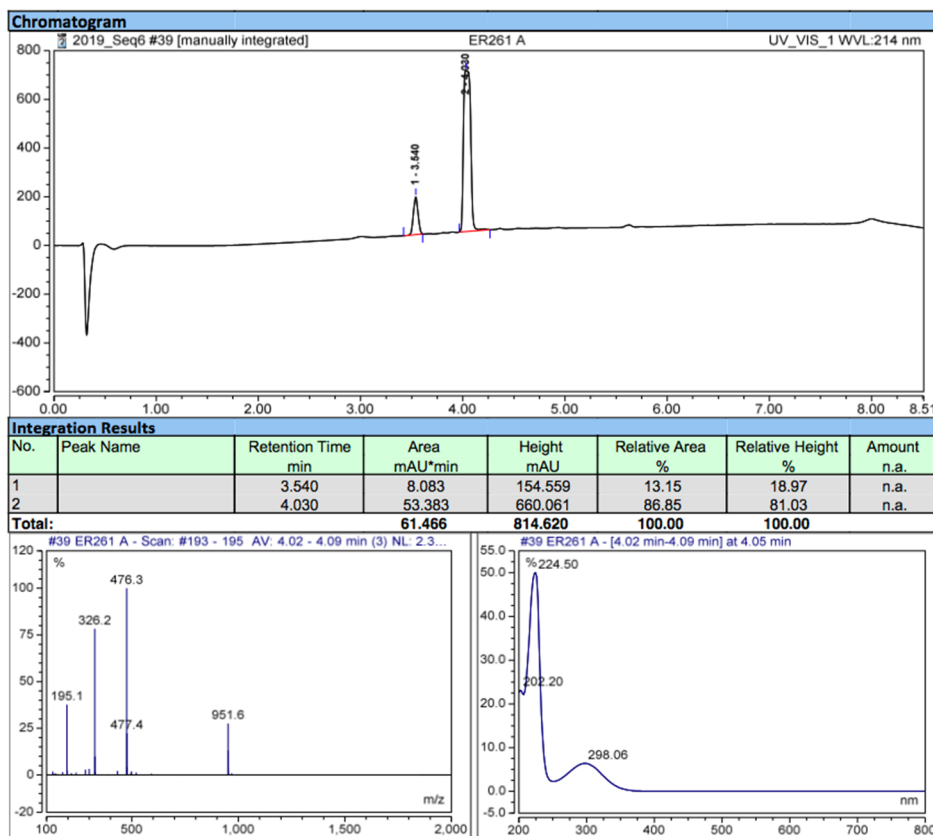

**Figure S9.** RP-HPLC-MS analysis of BCN-PEG<sub>2</sub>-maleimide. (Top) RP-HPLC chromatogram. Note: the impurity at  $t_r = 3.54\text{ min}$  corresponds to the hydrolyzed or hydrated product (mass  $m/z = 494$ ). (Bottom) ESI (+)-LRMS and UV-Vis absorbance spectrum.

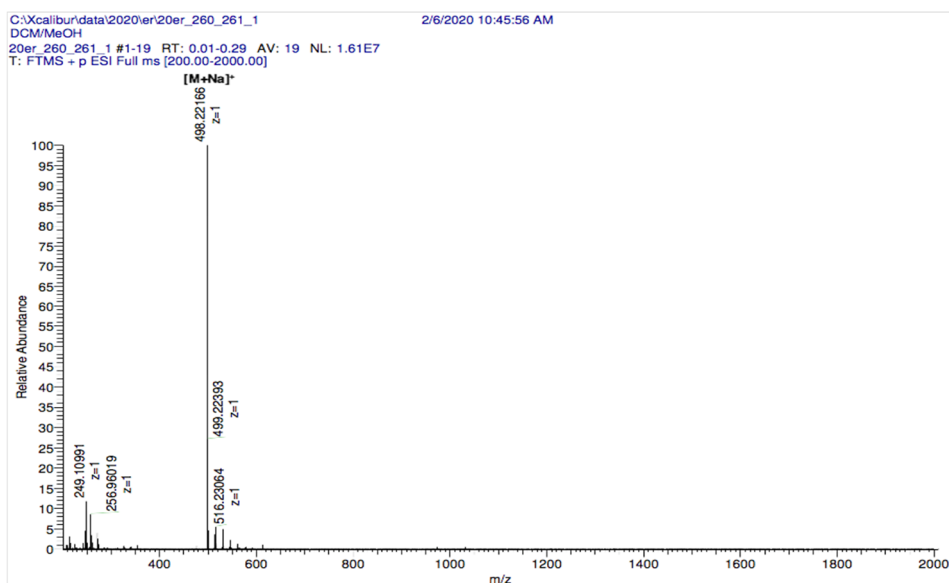

**Figure S10.** HRMS analysis of BCN-PEG<sub>2</sub>-maleimide.

7D12-BCN.

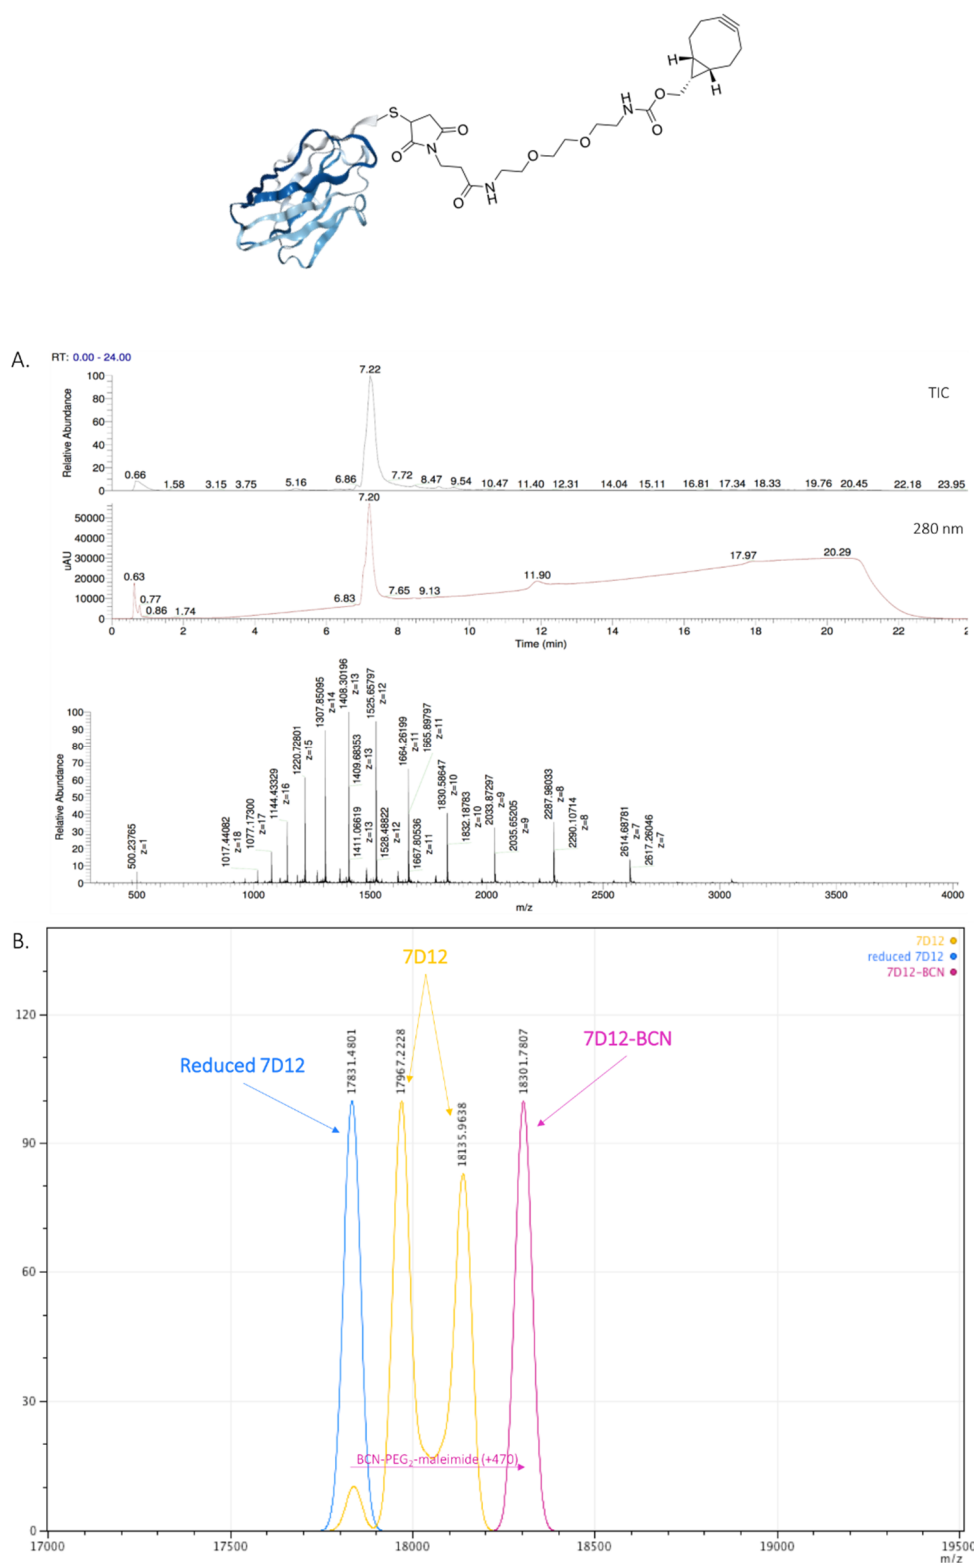

**Figure S11.** RP-HPLC-MS (Orbitrap) analysis of compound 7D12-BCN. A. (Top) RP-HPLC chromatograms (TIC and 280 nm). (Bottom) Multicharged ESI-MS spectrum. B. Deconvoluted MS spectrum of native 7D12, reduced 7D12 and 7D12-BCN.

### DTPA-IRDye700DX-7D12

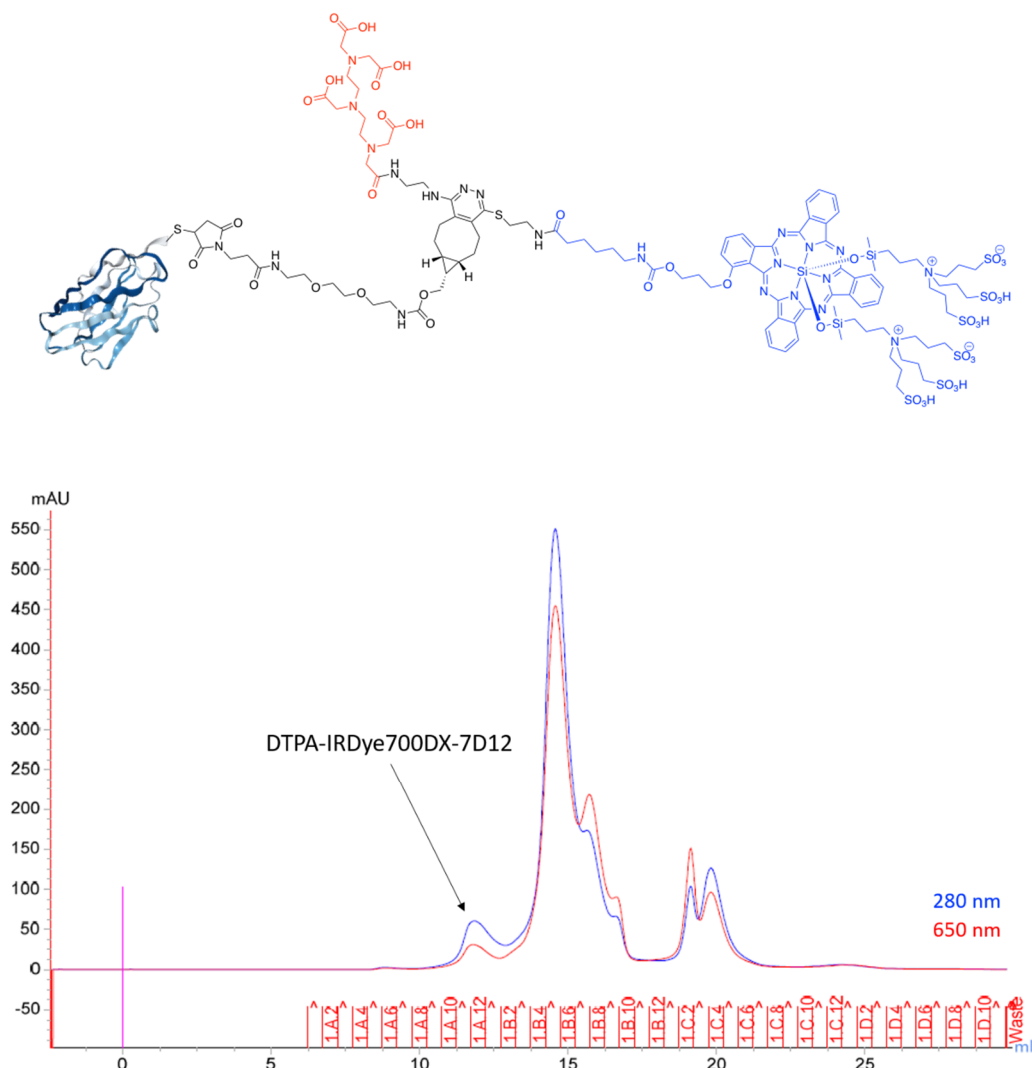

Figure S12. FPLC purification chromatogram of the compound DTPA-IRDye700DX-7D12.

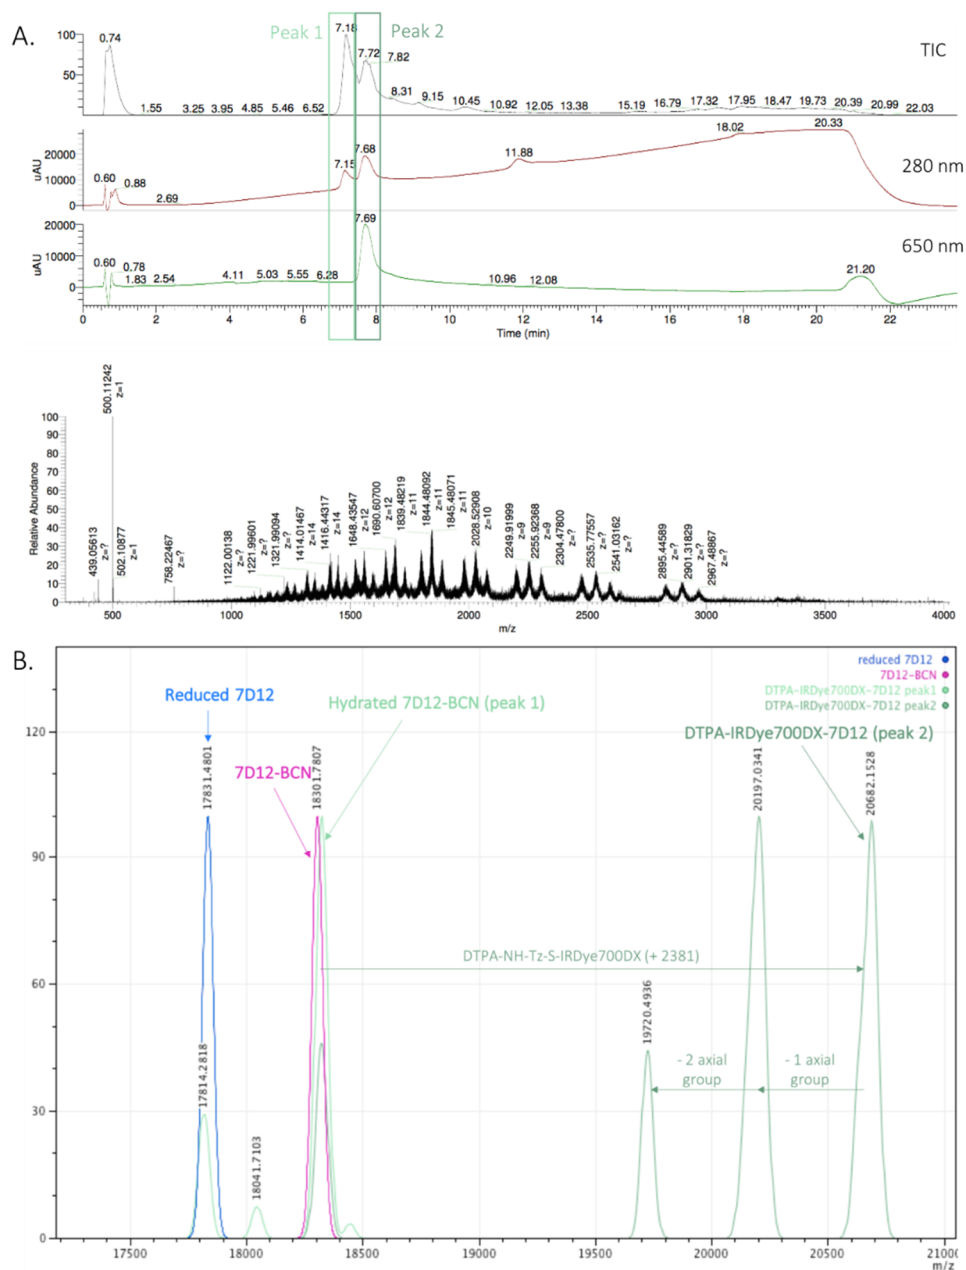

**Figure S13.** RP-HPLC-MS (Orbitrap) analysis of compound DTPA-IRDye700DX-7D12. A. (Top) RP-HPLC chromatograms (TIC, 280 nm and 650 nm). (Bottom) Multicharged ESI-MS spectrum. B. Deconvoluted MS spectrum of reduced 7D12, 7D12-BCN and DTPA-IRDye700DX-7D12.

## Spectral properties of compounds

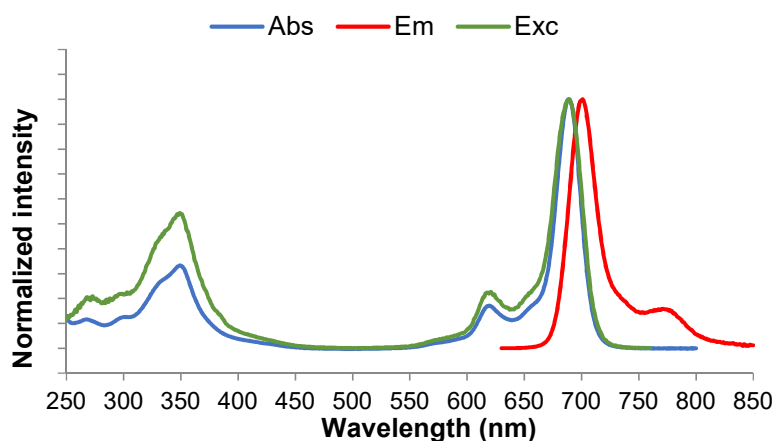

**Figure S14.** Normalized photophysical spectra (absorbance, excitation and emission) of compound IRDye700DX.  $\lambda_{\text{Ex, max}} = 689 \text{ nm}$ ,  $\lambda_{\text{Em, max}} = 701 \text{ nm}$ .

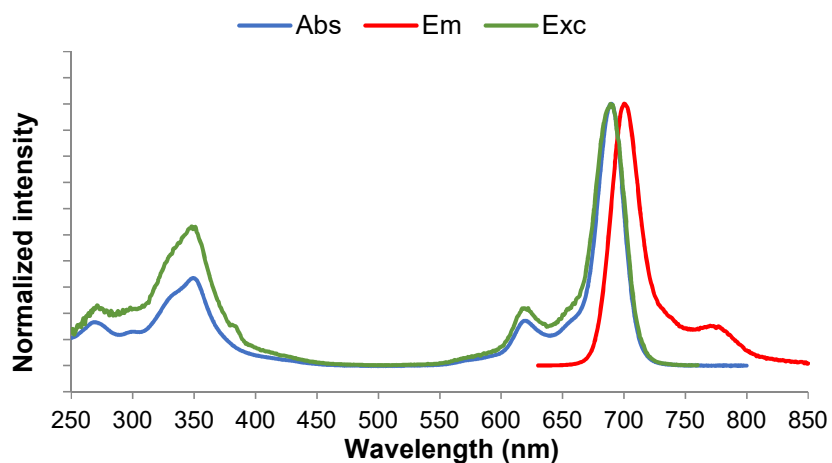

**Figure S15.** Normalized photophysical spectra (absorbance, excitation and emission) of bimodal probe DTPA-NH-Tz-S-IRDye700DX.  $\lambda_{\text{Ex, max}} = 689 \text{ nm}$ ,  $\lambda_{\text{Em, max}} = 700 \text{ nm}$

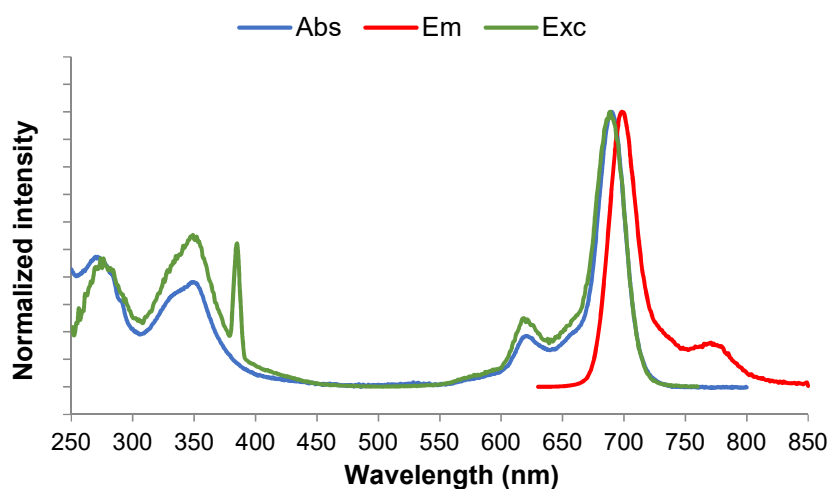

**Figure S16.** Normalized photophysical spectra (absorbance, excitation and emission) of bimodal conjugate DTPA-IRDye700DX-7D12.  $\lambda_{\text{Ex, max}} = 689 \text{ nm}$ ,  $\lambda_{\text{Em, max}} = 698 \text{ nm}$

### Stability test by RP-HPLC in radiolabeling-like conditions

8.3  $\mu\text{L}$  of 0.05 M HCl and 16.6  $\mu\text{L}$  of 0.5 M MES were added to a solution of DTPA-IRDye700DX-7D12 in PBS (1.04 mg/mL, 20  $\mu\text{g}$ ). The resulting solution was stirred in a thermomixer (900 rpm, 25  $^{\circ}\text{C}$ ). After 0 min, 1 h, 2 h, 4 h a sample (15  $\mu\text{L}$ ) of solution was collected and analyzed by RP-HPLC-MS (Orbitrap) at a wavelength of 280 nm and 650 nm (Figure S17). The separation was achieved on a Thermo Scientific™ MAbPac™ column (4  $\mu\text{m}$ , 50  $\times$  21 mm) with the following eluents: A: H<sub>2</sub>O, 0.1% FA + 0.02% TFA and B: MeCN/H<sub>2</sub>O (90 : 10, v/v), 0.1% FA + 0.02% TFA, and a linear gradient program: 5% to 100% of B in 15 min, 100% B for 3 min, 100% to 5% B in 0.1 min and 5% B for 6 min, at a flow rate of 0.3 mL/min, at 80  $^{\circ}\text{C}$ .

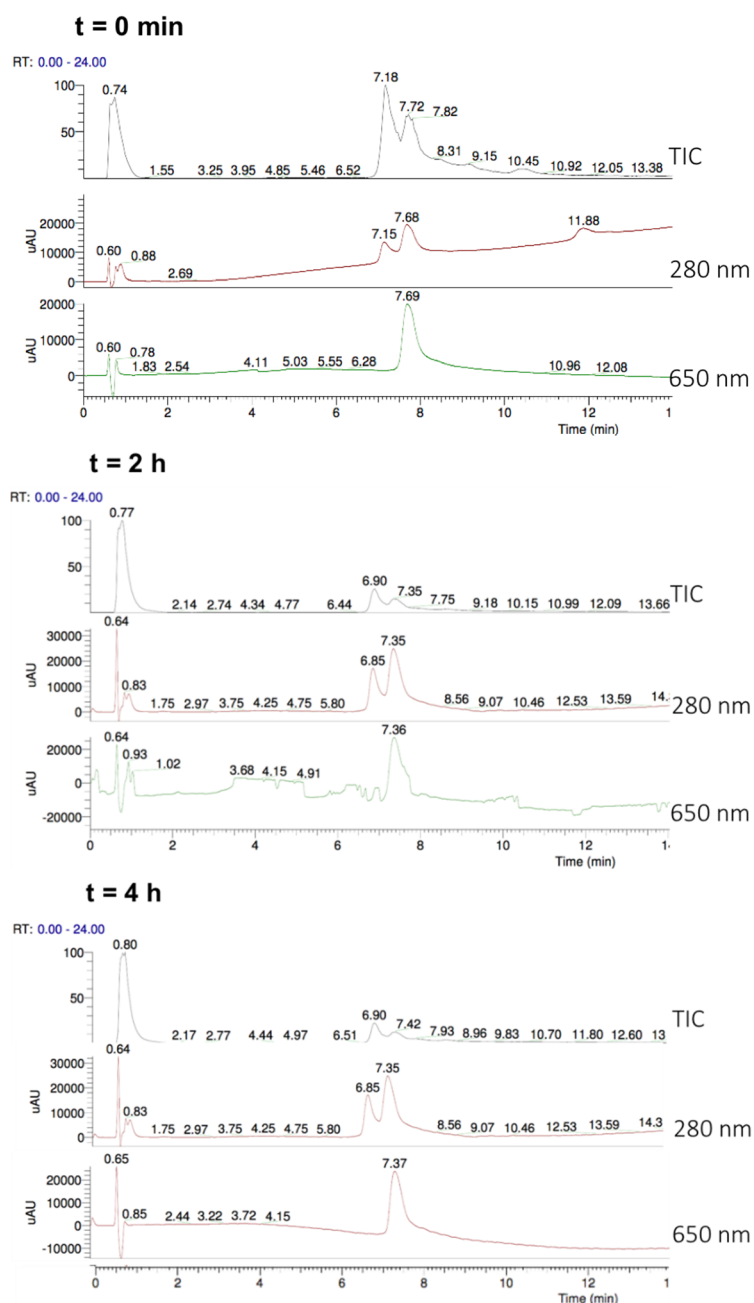

**Figure S17.** RP-HPLC-MS chromatograms (TIC, 280 nm and 650 nm) of compound DTPA-IRDye700DX-7D12 after 0 min, 2 h and 4 h of incubation in radiolabeling-like conditions.
